# Supplementary material for: Conserved Nutrient Sensor O-GlcNAc Transferase Is Integral to C. elegans Pathogen-Specific Immunity
Source: PubMed Central journal article supplement (PMC4256294; doi:10.1371/journal.pone.0113231), 2014-12-04
Supplement: pone.0113231.s008.pdf [file pone.0113231.s008.pdf]

Table S1. Lifespan statistics for animals fed OP50, *S. aureus*, and *P. aeruginosa*

| Experiment 1: OP50 fed               |    |           |                 |                          |
|--------------------------------------|----|-----------|-----------------|--------------------------|
|                                      | N  | n, censor | Median Survival | P value logrank (vs. N2) |
| N2                                   | 89 | 1         | 386             |                          |
| <i>ogt-1(ok430)</i>                  | 84 | 7         | 482             | <0.0001                  |
| <i>ogt-1(ok1474)</i>                 | 67 | 23        | 410             | 0.0008                   |
| <i>oga- (ok1207)</i>                 | 65 | 27        | 482             | <0.0001                  |
| <i>oga-1(tm3642)</i>                 | 78 | 12        | 386             | 0.0009                   |
| <i>pmk-1(km25)</i>                   | 73 | 17        | 386             | 0.5155                   |
| <i>ogt1 (ok1474); oga-1 (ok1207)</i> | 79 | 11        | 386             | 0.512                    |
| <i>ogt-1(ok1474); pmk-1(km25)</i>    | 59 | 31        | 356             | 0.1396                   |
| <i>pmk-1(km25); oga-1(ok1207)</i>    | 58 | 32        | 386             | 0.0978                   |
| <i>bar-1(ga80)</i>                   | 69 | 21        | 166             | <0.0001                  |
| <i>ogt-1(ok1474);bar-1(ga80)</i>     | 32 | 20        | 96              | <0.0001                  |
| <i>oga-1(ok1207) bar-1(ga80)</i>     | 57 | 34        | 144             | <0.0001                  |

  

| Experiment 2: OP50 fed            |    |           |                 |                          |
|-----------------------------------|----|-----------|-----------------|--------------------------|
|                                   | N  | n, censor | Median Survival | P value logrank (vs. N2) |
| N2                                | 57 | 3         | 378             |                          |
| <i>ogt-1(ok430)</i>               | 66 | 24        | 455             | 0.0009                   |
| <i>oga-1(tm3642)</i>              | 67 | 23        | 378             | 0.7857                   |
| <i>pmk-1(km25)</i>                | 76 | 14        | 378             | 0.1668                   |
| <i>ogt-1(ok430); pmk-1(km25)</i>  | 74 | 16        | 455             | 0.0066                   |
| <i>pmk-1(km25); oga-1(tm3642)</i> | 69 | 21        | 408             | 0.6035                   |

  

| Experiment 3: OP50 fed            |     |           |                 |                          |
|-----------------------------------|-----|-----------|-----------------|--------------------------|
|                                   | N   | n, censor | Median Survival | P value logrank (vs. N2) |
| N2                                | 118 | 7         | 357             |                          |
| <i>ogt-1(ok430)</i>               | 78  | 14        | 451             | <0.0001                  |
| <i>oga-1(tm3642)</i>              | 114 | 6         | 379             | 0.4712                   |
| <i>pmk-1(km25)</i>                | 100 | 20        | 357             | 0.994                    |
| <i>ogt-1(ok430); pmk-1(km25)</i>  | 69  | 22        | 451             | <0.0001                  |
| <i>pmk-1(km25); oga-1(tm3642)</i> | 107 | 14        | 451             | 0.0068                   |

  

| Experiment 4: OP50 fed               |    |           |                 |                          |
|--------------------------------------|----|-----------|-----------------|--------------------------|
|                                      | N  | n, censor | Median Survival | P value logrank (vs. N2) |
| N2                                   | 86 | 4         | 360             |                          |
| <i>ogt-1(ok1474)</i>                 | 76 | 14        | 410             | 0.0014                   |
| <i>oga- (ok1207)</i>                 | 69 | 21        | 410             | 0.001                    |
| <i>pmk-1(km25)</i>                   | 80 | 20        | 360             | 0.0143                   |
| <i>ogt-1(ok1474); oga-1 (ok1207)</i> | 98 | 8         | 385             | 0.2797                   |
| <i>ogt-1(ok1474); pmk-1(km25)</i>    | 93 | 22        | 385             | 0.6879                   |
| <i>pmk-1(km25); oga-1(ok1207)</i>    | 90 | 20        | 385             | 0.0262                   |

  

| Experiment 5: OP50 fed           |     |           |                 |                          |
|----------------------------------|-----|-----------|-----------------|--------------------------|
|                                  | N   | n, censor | Median Survival | P value logrank (vs. N2) |
| N2                               | 144 | 6         | 384             |                          |
| <i>bar-1(ga80)</i>               | 122 | 18        | 140             | <0.0001                  |
| <i>ogt-1(ok430);bar-1(ga80)</i>  | 128 | 18        | 68              | <0.0001                  |
| <i>ogt-1(ok1474);bar-1(ga80)</i> | 135 | 19        | 96              | <0.0001                  |
| <i>oga-1(ok1207) bar-1(ga80)</i> | 144 | 7         | 120             | <0.0001                  |
| <i>oga-1(tm3642) bar-1(ga80)</i> | 134 | 4         | 68              | <0.0001                  |

  

| Experiment 6: OP50 fed           |    |           |                 |                          |
|----------------------------------|----|-----------|-----------------|--------------------------|
|                                  | N  | n, censor | Median Survival | P value logrank (vs. N2) |
| N2                               | 50 | 9         | 383             |                          |
| <i>bar-1(ga80)</i>               | 60 | 21        | 146             | <0.0001                  |
| <i>ogt-1(ok430);bar-1(ga80)</i>  | 79 | 17        | 74              | <0.0001                  |
| <i>ogt-1(ok1474);bar-1(ga80)</i> | 87 | 5         | 74              | <0.0001                  |
| <i>oga-1(ok1207) bar-1(ga80)</i> | 78 | 12        | 122             | <0.0001                  |
| <i>oga-1(tm3642) bar-1(ga80)</i> | 78 | 9         | 50              | <0.0001                  |

| Experiment 1: P. aeruginosa exposure |    |           |                 |                          |
|--------------------------------------|----|-----------|-----------------|--------------------------|
|                                      | N  | n, censor | Median Survival | P value logrank (vs. N2) |
| N2                                   | 87 | 2         | 144             |                          |
| <i>ogt-1(ok430)</i>                  | 85 | 4         | 150             | <0.0001                  |
| <i>ogt-1(ok1474)</i>                 | 76 | 19        | 144             | 0.0061                   |
| <i>oga- (ok1207)</i>                 | 95 | 1         | 144             | 0.0318                   |
| <i>oga-1(tm3642)</i>                 | 85 | 2         | 144             | 0.3393                   |
| <i>pmk-1(km25)</i>                   | 75 | 9         | 96              | <0.0001                  |
| <i>ogt1 (ok1474); oga-1 (ok1207)</i> | 97 | 0         | 144             | 0.2535                   |
| <i>ogt-1(ok430); pmk-1(km25)</i>     | 94 | 4         | 96              | <0.0001                  |
| <i>ogt-1(ok1474); pmk-1(km25)</i>    | 89 | 4         | 96              | <0.0001                  |
| <i>pmk-1(km25); oga-1(ok1207)</i>    | 96 | 0         | 96              | <0.0001                  |
| <i>pmk-1(km25); oga-1(tm3642)</i>    | 92 | 3         | 96              | <0.0001                  |

| Experiment 2: P. aeruginosa exposure |     |           |                 |                          |
|--------------------------------------|-----|-----------|-----------------|--------------------------|
|                                      | N   | n, censor | Median Survival | P value logrank (vs. N2) |
| N2                                   | 90  | 1         | 93              |                          |
| <i>ogt-1(ok430)</i>                  | 104 | 6         | 117             | <0.0001                  |
| <i>ogt-1(ok1474)</i>                 | 96  | 4         | 117             | <0.0001                  |
| <i>oga- (ok1207)</i>                 | 105 | 2         | 117             | <0.0001                  |
| <i>oga-1(tm3642)</i>                 | 67  | 10        | 117             | 0.0101                   |
| <i>pmk-1(km25)</i>                   | 108 | 4         | 68              | <0.0001                  |
| <i>ogt1 (ok1474); oga-1 (ok1207)</i> | 79  | 14        | 117             | <0.0001                  |
| <i>ogt-1(ok430); pmk-1(km25)</i>     | 76  | 12        | 68              | <0.0001                  |
| <i>ogt-1(ok1474); pmk-1(km25)</i>    | 93  | 2         | 68              | <0.0001                  |
| <i>pmk-1(km25); oga-1(ok1207)</i>    | 86  | 3         | 68              | <0.0001                  |
| <i>pmk-1(km25); oga-1(tm3642)</i>    | 86  | 6         | 45              | <0.0001                  |

| Experiment 3: P. aeruginosa exposure |     |           |                 |                          |
|--------------------------------------|-----|-----------|-----------------|--------------------------|
|                                      | N   | n, censor | Median Survival | P value logrank (vs. N2) |
| N2                                   | 97  | 0         | 123             |                          |
| <i>ogt-1(ok430)</i>                  | 100 | 6         | 123             | 0.0333                   |
| <i>ogt-1(ok1474)</i>                 | 102 | 5         | 123             | 0.0592                   |
| <i>oga- (ok1207)</i>                 | 104 | 6         | 123             | 0.0541                   |
| <i>oga-1(tm3642)</i>                 | 75  | 21        | 123             | 0.0434                   |
| <i>pmk-1(km25)</i>                   | 95  | 0         | 50              | <0.0001                  |
| <i>ogt1 (ok1474); oga-1 (ok1207)</i> | 104 | 6         | 123             | 0.0421                   |
| <i>ogt-1(ok430); pmk-1(km25)</i>     | 107 | 2         | 73              | <0.0001                  |
| <i>ogt-1(ok1474); pmk-1(km25)</i>    | 103 | 0         | 50              | <0.0001                  |
| <i>pmk-1(km25); oga-1(ok1207)</i>    | 97  | 1         | 73              | <0.0001                  |
| <i>pmk-1(km25); oga-1(tm3642)</i>    | 105 | 2         | 50              | <0.0001                  |

| Experiment 1: S. aureus exposure  |     |           |                 |                          |
|-----------------------------------|-----|-----------|-----------------|--------------------------|
|                                   | N   | n, censor | Median Survival | P value logrank (vs. N2) |
| N2                                | 107 | 13        | 50              |                          |
| <i>ogt-1(ok430)</i>               | 104 | 11        | 42              | <0.0001                  |
| <i>oga-1(tm3642)</i>              | 113 | 7         | 50              | 0.5224                   |
| <i>pmk-1(km25)</i>                | 108 | 7         | 42              | <0.0001                  |
| <i>ogt-1(ok430); pmk-1(km25)</i>  | 95  | 8         | 28              | <0.0001                  |
| <i>pmk-1(km25); oga-1(tm3642)</i> | 114 | 8         | 42              | <0.0001                  |

| Experiment 2: S. aureus exposure |    |           |                 |                          |
|----------------------------------|----|-----------|-----------------|--------------------------|
|                                  | N  | n, censor | Median Survival | P value logrank (vs. N2) |
| N2                               | 15 | 0         | 74              |                          |
| <i>ogt-1(ok1474)</i>             | 19 | 1         | 44              | 0.0078                   |
| <i>oga- (ok1207)</i>             | 20 | 0         | 74              | 0.1839                   |

| Experiment 3: S. aureus exposure |    |           |                 |                          |
|----------------------------------|----|-----------|-----------------|--------------------------|
|                                  | N  | n, censor | Median Survival | P value logrank (vs. N2) |
| N2                               | 74 | 16        | 65              |                          |
| <i>ogt-1(ok430)</i>              | 89 | 0         | 42              | <0.0001                  |
| <i>ogt-1(ok1474)</i>             | 90 | 0         | 24              | <0.0001                  |
| <i>oga- (ok1207)</i>             | 84 | 0         | 49              | 0.0052                   |

|                                    |    |    |    |         |
|------------------------------------|----|----|----|---------|
| <i>oga-1(tm3642)</i>               | 75 | 15 | 49 | 0.0241  |
| <i>pmk-1(km25)</i>                 | 73 | 2  | 20 | <0.0001 |
| <i>ogt1(ok1474); oga-1(ok1207)</i> | 87 | 0  | 42 | <0.0001 |
| <i>ogt-1(ok430); pmk-1(km25)</i>   | 67 | 13 | 20 | <0.0001 |
| <i>ogt-1(ok1474); pmk-1(km25)</i>  | 73 | 7  | 20 | <0.0001 |
| <i>pmk-1(km25); oga-1(ok1207)</i>  | 85 | 5  | 24 | <0.0001 |
| <i>pmk-1(km25); oga-1(tm3642)</i>  | 73 | 5  | 42 | <0.0001 |

Experiment 4: *S. aureus* exposure

|                      | N  | n, censor | Median Survival | P value logrank (vs. N2) |
|----------------------|----|-----------|-----------------|--------------------------|
| N2                   | 82 | 9         | 50              |                          |
| <i>ogt-1(ok430)</i>  | 86 | 4         | 31              | <0.0001                  |
| <i>ogt-1(ok1474)</i> | 92 | 0         | 31              | <0.0001                  |
| <i>oga- (ok1207)</i> | 91 | 0         | 50              | 0.3773                   |
| <i>oga-1(tm3642)</i> | 86 | 6         | 45.5            | 0.8152                   |
| <i>pmk-1(km25)</i>   | 89 | 5         | 26              | <0.0001                  |
| <i>bar-1(ga80)</i>   | 81 | 8         | 26              | <0.0001                  |

Experiment 5: *S. aureus* exposure

|                      | N   | n, censor | Median Survival | P value logrank (vs. N2) |
|----------------------|-----|-----------|-----------------|--------------------------|
| N2                   | 42  | 51        | 50              |                          |
| <i>ogt-1(ok430)</i>  | 73  | 22        | 50              | <0.0001                  |
| <i>ogt-1(ok1474)</i> | 77  | 23        | 50              | 0.0075                   |
| <i>oga- (ok1207)</i> | 54  | 41        | 50              | 0.451                    |
| <i>oga-1(tm3642)</i> | 48  | 49        | 50              | 0.8194                   |
| <i>pmk-1(km25)</i>   | 51  | 49        | 41              | 0.0231                   |
| <i>bar-1(ga80)</i>   | 104 | 21        | 41              | <0.0001                  |

Experiment 6: *S. aureus* exposure

|                                    | N   | n, censor | Median Survival | P value logrank (vs. N2) |
|------------------------------------|-----|-----------|-----------------|--------------------------|
| N2                                 | 113 | 10        | 50              |                          |
| <i>ogt-1(ok430)</i>                | 103 | 7         | 42              | <0.0001                  |
| <i>ogt-1(ok1474)</i>               | 109 | 3         | 42              | <0.0001                  |
| <i>oga- (ok1207)</i>               | 101 | 9         | 50              | 0.2529                   |
| <i>oga-1(tm3642)</i>               | 105 | 5         | 50              | 0.6217                   |
| <i>pmk-1(km25)</i>                 | 106 | 6         | 42              | <0.0001                  |
| <i>ogt1(ok1474); oga-1(ok1207)</i> | 110 | 3         | 42              | <0.0001                  |
| <i>bar-1(ga80)</i>                 | 96  | 14        | 30              | <0.0001                  |
| <i>ogt-1(ok1474);bar-1(ga80)</i>   | 24  | 43        | 42              | <0.0001                  |
| <i>oga-1(ok1207) bar-1(ga80)</i>   | 84  | 11        | 42              | <0.0001                  |

Experiment 7: *S. aureus* exposure

|                                    | N   | n, censor | Median Survival | P value logrank (vs. N2) |
|------------------------------------|-----|-----------|-----------------|--------------------------|
| N2                                 | 103 | 13        | 50              |                          |
| <i>ogt-1(ok430)</i>                | 103 | 11        | 46              | <0.0001                  |
| <i>ogt-1(ok1474)</i>               | 94  | 7         | 40              | <0.0001                  |
| <i>oga- (ok1207)</i>               | 113 | 3         | 50              | 0.3144                   |
| <i>oga-1(tm3642)</i>               | 110 | 10        | 50              | 0.7666                   |
| <i>pmk-1(km25)</i>                 | 99  | 21        | 40              | <0.0001                  |
| <i>ogt1(ok1474); oga-1(ok1207)</i> | 100 | 5         | 46              | <0.0001                  |
| <i>ogt-1(ok1474); pmk-1(km25)</i>  | 89  | 16        | 26              | <0.0001                  |
| <i>pmk-1(km25); oga-1(ok1207)</i>  | 91  | 14        | 30              | <0.0001                  |
| <i>bar-1(ga80)</i>                 | 82  | 23        | 40              | <0.0001                  |
| <i>ogt-1(ok1474);bar-1(ga80)</i>   | 33  | 21        | 40              | <0.0001                  |
| <i>oga-1(ok1207) bar-1(ga80)</i>   | 56  | 39        | 40              | <0.0001                  |

Experiment 8: *S. aureus* exposure \*48 hr RNAi feeding

|                                  | N   | n, censor | Median Survival | P value logrank (vs. N2) |
|----------------------------------|-----|-----------|-----------------|--------------------------|
| N2                               | 83  | 21        | 356             |                          |
| <i>bar-1(ga80)</i>               | 124 | 1         | 44              | < 0.0001                 |
| <i>ogt-1(ok430);bar-1(ga80)</i>  | 122 | 8         | 44              | < 0.0001                 |
| <i>ogt-1(ok1474);bar-1(ga80)</i> | 151 | 9         | 44              | < 0.0001                 |
| <i>oga-1(ok1207) bar-1(ga80)</i> | 118 | 0         | 44              | < 0.0001                 |
| <i>oga-1(tm3642) bar-1(ga80)</i> | 134 | 1         | 44              | < 0.0001                 |

Experiment 9: *S. aureus* exposure \*48 hr RNAi feeding

|                                  | N   | n, censor | Median Survival | P value logrank (vs. N2) |
|----------------------------------|-----|-----------|-----------------|--------------------------|
| N2                               | 71  | 9         | 289             |                          |
| <i>bar-1(ga80)</i>               | 66  | 2         | 47              | < 0.0001                 |
| <i>ogt-1(ok430);bar-1(ga80)</i>  | 101 | 32        | 47              | < 0.0001                 |
| <i>ogt-1(ok1474);bar-1(ga80)</i> | 78  | 20        | 47              | < 0.0001                 |
| <i>oga-1(ok1207) bar-1(ga80)</i> | 71  | 2         | 47              | < 0.0001                 |
| <i>oga-1(tm3642) bar-1(ga80)</i> | 90  | 4         | 47              | < 0.0001                 |
