# Supplementary material for: Conserved Nutrient Sensor O-GlcNAc Transferase Is Integral to C. elegans Pathogen-Specific Immunity
Source: PubMed Central journal article supplement (PMC4256294; doi:10.1371/journal.pone.0113231), 2014-12-04
Supplement: pone.0113231.s009.pdf [file pone.0113231.s009.pdf]

Table S2. Pumping rate statistics

| Alpha                          | 0.01       |              |         |                    |        |        |            |             |    |    |        |     |
|--------------------------------|------------|--------------|---------|--------------------|--------|--------|------------|-------------|----|----|--------|-----|
|                                | Mean Diff. | Significant? | Summary | Individual P Value | Mean 1 | Mean 2 | Mean Diff. | SE of diff. | n1 | n2 | t      | DF  |
| N2 OP50 vs. ok430 OP50         | 7.125      | No           | ns      | 0.2291             | 78.94  | 71.81  | 7.125      | 5.915       | 16 | 16 | 1.204  | 422 |
| N2 OP50 vs. ok1474 OP50        | 3.392      | No           | ns      | 0.605              | 78.94  | 75.55  | 3.392      | 6.553       | 16 | 11 | 0.5176 | 422 |
| N2 OP50 vs. ok1207 OP50        | 4.574      | No           | ns      | 0.4856             | 78.94  | 74.36  | 4.574      | 6.553       | 16 | 11 | 0.698  | 422 |
| N2 OP50 vs. tm3642 OP50        | 2.375      | No           | ns      | 0.6883             | 78.94  | 76.56  | 2.375      | 5.915       | 16 | 16 | 0.4015 | 422 |
| N2 OP50 vs. km25 OP50          | 2          | No           | ns      | 0.7355             | 78.94  | 76.94  | 2          | 5.915       | 16 | 16 | 0.3381 | 422 |
| N2 OP50 vs. ok1474;ok1207 OP50 | 4.483      | No           | ns      | 0.4943             | 78.94  | 74.45  | 4.483      | 6.553       | 16 | 11 | 0.6841 | 422 |
| N2 OP50 vs. ok430;km25 OP50    | 12.39      | No           | ns      | 0.0593             | 78.94  | 66.55  | 12.39      | 6.553       | 16 | 11 | 1.891  | 422 |
| N2 OP50 vs. ok1474;km25 OP50   | 8.301      | No           | ns      | 0.206              | 78.94  | 70.64  | 8.301      | 6.553       | 16 | 11 | 1.267  | 422 |
| N2 OP50 vs. ok1207;km25 OP50   | 4.483      | No           | ns      | 0.4943             | 78.94  | 74.45  | 4.483      | 6.553       | 16 | 11 | 0.6841 | 422 |
| N2 OP50 vs. tm3642;km25 OP50   | 6.665      | No           | ns      | 0.3097             | 78.94  | 72.27  | 6.665      | 6.553       | 16 | 11 | 1.017  | 422 |
| N2 OP50 vs. N2 SA              | 25.38      | Yes          | ****    | < 0.0001           | 78.94  | 53.56  | 25.38      | 5.749       | 16 | 18 | 4.415  | 422 |
| N2 OP50 vs. ok430 SA           | 48.14      | Yes          | ****    | < 0.0001           | 78.94  | 30.8   | 48.14      | 5.357       | 16 | 25 | 8.987  | 422 |
| N2 OP50 vs. ok1474 SA          | 41.07      | Yes          | ****    | < 0.0001           | 78.94  | 37.87  | 41.07      | 6.013       | 16 | 15 | 6.83   | 422 |
| N2 OP50 vs. ok1207 SA          | 24.85      | Yes          | ***     | 0.0001             | 78.94  | 54.08  | 24.85      | 6.389       | 16 | 12 | 3.89   | 422 |
| N2 OP50 vs. tm3642 SA          | 24.05      | Yes          | ****    | < 0.0001           | 78.94  | 54.89  | 24.05      | 5.749       | 16 | 18 | 4.183  | 422 |
| N2 OP50 vs. km25 SA            | 36.53      | Yes          | ****    | < 0.0001           | 78.94  | 42.41  | 36.53      | 5.497       | 16 | 22 | 6.645  | 422 |
| N2 OP50 vs. ok1474;ok1207 SA   | 48.56      | Yes          | ****    | < 0.0001           | 78.94  | 30.38  | 48.56      | 5.915       | 16 | 16 | 8.21   | 422 |
| N2 OP50 vs. ok430;km25 SA      | 71.39      | Yes          | ****    | < 0.0001           | 78.94  | 7.545  | 71.39      | 6.553       | 16 | 11 | 10.89  | 422 |
| N2 OP50 vs. ok1474;km25 SA     | 69.14      | Yes          | ****    | < 0.0001           | 78.94  | 9.8    | 69.14      | 6.745       | 16 | 10 | 10.25  | 422 |
| N2 OP50 vs. ok1207;km25 SA     | 40.17      | Yes          | ****    | < 0.0001           | 78.94  | 38.77  | 40.17      | 6.247       | 16 | 13 | 6.43   | 422 |
| N2 OP50 vs. tm3642;km25 SA     | 43.44      | Yes          | ****    | < 0.0001           | 78.94  | 35.5   | 43.44      | 5.915       | 16 | 16 | 7.343  | 422 |
| N2 OP50 vs. N2 PA              | 12.64      | No           | ns      | 0.0617             | 78.94  | 66.3   | 12.64      | 6.745       | 16 | 10 | 1.874  | 422 |
| N2 OP50 vs. ok430 PA           | 13.74      | No           | *       | 0.0423             | 78.94  | 65.2   | 13.74      | 6.745       | 16 | 10 | 2.037  | 422 |
| N2 OP50 vs. ok1474 PA          | 15.84      | No           | *       | 0.0193             | 78.94  | 63.1   | 15.84      | 6.745       | 16 | 10 | 2.348  | 422 |
| N2 OP50 vs. ok1207 PA          | 25.34      | Yes          | ***     | 0.0002             | 78.94  | 53.6   | 25.34      | 6.745       | 16 | 10 | 3.757  | 422 |
| N2 OP50 vs. tm3642 PA          | 29.64      | Yes          | ****    | < 0.0001           | 78.94  | 49.3   | 29.64      | 6.745       | 16 | 10 | 4.394  | 422 |
| N2 OP50 vs. km25 PA            | 42.54      | Yes          | ****    | < 0.0001           | 78.94  | 36.4   | 42.54      | 6.745       | 16 | 10 | 6.307  | 422 |
| N2 OP50 vs. ok1474;ok1207 PA   | 20.34      | Yes          | **      | 0.0027             | 78.94  | 58.6   | 20.34      | 6.745       | 16 | 10 | 3.015  | 422 |
| N2 OP50 vs. ok430;km25 PA      | 59.34      | Yes          | ****    | < 0.0001           | 78.94  | 19.6   | 59.34      | 6.745       | 16 | 10 | 8.798  | 422 |
| N2 OP50 vs. ok1474;km25 PA     | 39.54      | Yes          | ****    | < 0.0001           | 78.94  | 39.4   | 39.54      | 6.745       | 16 | 10 | 5.862  | 422 |
| N2 OP50 vs. ok1207;km25 PA     | 42.64      | Yes          | ****    | < 0.0001           | 78.94  | 36.3   | 42.64      | 6.745       | 16 | 10 | 6.322  | 422 |

|                                         |          |     |      |          |       |       |          |       |    |    |         |     |
|-----------------------------------------|----------|-----|------|----------|-------|-------|----------|-------|----|----|---------|-----|
| N2 OP50 vs. tm3642;km25 PA              | 53.04    | Yes | **** | < 0.0001 | 78.94 | 25.9  | 53.04    | 6.745 | 16 | 10 | 7.864   | 422 |
| ok430 OP50 vs. ok430;km25 OP50          | 5.267    | No  | ns   | 0.422    | 71.81 | 66.55 | 5.267    | 6.553 | 16 | 11 | 0.8037  | 422 |
| ok430 OP50 vs. ok430 SA                 | 41.01    | Yes | **** | < 0.0001 | 71.81 | 30.8  | 41.01    | 5.357 | 16 | 25 | 7.656   | 422 |
| ok430 OP50 vs. ok430 PA                 | 6.613    | No  | ns   | 0.3274   | 71.81 | 65.2  | 6.613    | 6.745 | 16 | 10 | 0.9804  | 422 |
| ok1474 OP50 vs. ok1474;ok1207 OP50      | 1.091    | No  | ns   | 0.8785   | 75.55 | 74.45 | 1.091    | 7.134 | 11 | 11 | 0.1529  | 422 |
| ok1474 OP50 vs. ok1474;km25 OP50        | 4.909    | No  | ns   | 0.4918   | 75.55 | 70.64 | 4.909    | 7.134 | 11 | 11 | 0.6881  | 422 |
| ok1474 OP50 vs. ok1474 SA               | 37.68    | Yes | **** | < 0.0001 | 75.55 | 37.87 | 37.68    | 6.642 | 11 | 15 | 5.673   | 422 |
| ok1474 OP50 vs. ok1474 PA               | 12.45    | No  | ns   | 0.0894   | 75.55 | 63.1  | 12.45    | 7.31  | 11 | 10 | 1.702   | 422 |
| ok1207 OP50 vs. ok1474;ok1207 OP50      | -0.09091 | No  | ns   | 0.9898   | 74.36 | 74.45 | -0.09091 | 7.134 | 11 | 11 | 0.01274 | 422 |
| ok1207 OP50 vs. ok1207;km25 OP50        | -0.09091 | No  | ns   | 0.9898   | 74.36 | 74.45 | -0.09091 | 7.134 | 11 | 11 | 0.01274 | 422 |
| ok1207 OP50 vs. ok1207 SA               | 20.28    | Yes | **   | 0.0039   | 74.36 | 54.08 | 20.28    | 6.984 | 11 | 12 | 2.904   | 422 |
| ok1207 OP50 vs. ok1207 PA               | 20.76    | Yes | **   | 0.0047   | 74.36 | 53.6  | 20.76    | 7.31  | 11 | 10 | 2.84    | 422 |
| tm3642 OP50 vs. tm3642;km25 OP50        | 4.29     | No  | ns   | 0.5131   | 76.56 | 72.27 | 4.29     | 6.553 | 16 | 11 | 0.6546  | 422 |
| tm3642 OP50 vs. tm3642 SA               | 21.67    | Yes | ***  | 0.0002   | 76.56 | 54.89 | 21.67    | 5.749 | 16 | 18 | 3.77    | 422 |
| tm3642 OP50 vs. tm3642 PA               | 27.26    | Yes | **** | < 0.0001 | 76.56 | 49.3  | 27.26    | 6.745 | 16 | 10 | 4.042   | 422 |
| km25 OP50 vs. ok430;km25 OP50           | 10.39    | No  | ns   | 0.1135   | 76.94 | 66.55 | 10.39    | 6.553 | 16 | 11 | 1.586   | 422 |
| km25 OP50 vs. ok1474;km25 OP50          | 6.301    | No  | ns   | 0.3368   | 76.94 | 70.64 | 6.301    | 6.553 | 16 | 11 | 0.9615  | 422 |
| km25 OP50 vs. ok1207;km25 OP50          | 2.483    | No  | ns   | 0.705    | 76.94 | 74.45 | 2.483    | 6.553 | 16 | 11 | 0.3789  | 422 |
| km25 OP50 vs. tm3642;km25 OP50          | 4.665    | No  | ns   | 0.477    | 76.94 | 72.27 | 4.665    | 6.553 | 16 | 11 | 0.7118  | 422 |
| km25 OP50 vs. km25 SA                   | 34.53    | Yes | **** | < 0.0001 | 76.94 | 42.41 | 34.53    | 5.497 | 16 | 22 | 6.281   | 422 |
| km25 OP50 vs. km25 PA                   | 40.54    | Yes | **** | < 0.0001 | 76.94 | 36.4  | 40.54    | 6.745 | 16 | 10 | 6.01    | 422 |
| ok1474;ok1207 OP50 vs. ok1474;ok1207 SA | 44.08    | Yes | **** | < 0.0001 | 74.45 | 30.38 | 44.08    | 6.553 | 11 | 16 | 6.726   | 422 |
| ok1474;ok1207 OP50 vs. ok1474;ok1207 PA | 15.85    | No  | *    | 0.0307   | 74.45 | 58.6  | 15.85    | 7.31  | 11 | 10 | 2.169   | 422 |
| ok430;km25 OP50 vs. ok430;km25 SA       | 59       | Yes | **** | < 0.0001 | 66.55 | 7.545 | 59       | 7.134 | 11 | 11 | 8.27    | 422 |
| ok430;km25 OP50 vs. ok430;km25 PA       | 46.95    | Yes | **** | < 0.0001 | 66.55 | 19.6  | 46.95    | 7.31  | 11 | 10 | 6.422   | 422 |
| ok1474;km25 OP50 vs. ok1474;km25 SA     | 60.84    | Yes | **** | < 0.0001 | 70.64 | 9.8   | 60.84    | 7.31  | 11 | 10 | 8.322   | 422 |
| ok1474;km25 OP50 vs. ok1474;km25 PA     | 31.24    | Yes | **** | < 0.0001 | 70.64 | 39.4  | 31.24    | 7.31  | 11 | 10 | 4.273   | 422 |
| ok1207;km25 OP50 vs. ok1207;km25 SA     | 35.69    | Yes | **** | < 0.0001 | 74.45 | 38.77 | 35.69    | 6.854 | 11 | 13 | 5.206   | 422 |
| ok1207;km25 OP50 vs. ok1207;km25 PA     | 38.15    | Yes | **** | < 0.0001 | 74.45 | 36.3  | 38.15    | 7.31  | 11 | 10 | 5.219   | 422 |
| tm3642;km25 OP50 vs. tm3642;km25 SA     | 36.77    | Yes | **** | < 0.0001 | 72.27 | 35.5  | 36.77    | 6.553 | 11 | 16 | 5.611   | 422 |
| tm3642;km25 OP50 vs. tm3642;km25 PA     | 46.37    | Yes | **** | < 0.0001 | 72.27 | 25.9  | 46.37    | 7.31  | 11 | 10 | 6.343   | 422 |
| N2 SA vs. ok430 SA                      | 22.76    | Yes | **** | < 0.0001 | 53.56 | 30.8  | 22.76    | 5.172 | 18 | 25 | 4.4     | 422 |
| N2 SA vs. ok1474 SA                     | 15.69    | Yes | **   | 0.0076   | 53.56 | 37.87 | 15.69    | 5.849 | 18 | 15 | 2.682   | 422 |
| N2 SA vs. ok1207 SA                     | -0.5278  | No  | ns   | 0.9326   | 53.56 | 54.08 | -0.5278  | 6.235 | 18 | 12 | 0.08464 | 422 |
| N2 SA vs. tm3642 SA                     | -1.333   | No  | ns   | 0.8112   | 53.56 | 54.89 | -1.333   | 5.577 | 18 | 18 | 0.2391  | 422 |
| N2 SA vs. km25 SA                       | 11.15    | No  | *    | 0.0367   | 53.56 | 42.41 | 11.15    | 5.318 | 18 | 22 | 2.096   | 422 |
| N2 SA vs. ok1474;ok1207 SA              | 23.18    | Yes | **** | < 0.0001 | 53.56 | 30.38 | 23.18    | 5.749 | 18 | 16 | 4.032   | 422 |

|                                |       |     |      |          |       |       |       |       |    |    |         |     |
|--------------------------------|-------|-----|------|----------|-------|-------|-------|-------|----|----|---------|-----|
| N2 SA vs. ok430;km25 SA        | 46.01 | Yes | **** | < 0.0001 | 53.56 | 7.545 | 46.01 | 6.403 | 18 | 11 | 7.186   | 422 |
| N2 SA vs. ok1474;km25 SA       | 43.76 | Yes | **** | < 0.0001 | 53.56 | 9.8   | 43.76 | 6.599 | 18 | 10 | 6.631   | 422 |
| N2 SA vs. ok1207;km25 SA       | 14.79 | No  | *    | 0.0156   | 53.56 | 38.77 | 14.79 | 6.09  | 18 | 13 | 2.428   | 422 |
| N2 SA vs. tm3642;km25 SA       | 18.06 | Yes | **   | 0.0018   | 53.56 | 35.5  | 18.06 | 5.749 | 18 | 16 | 3.141   | 422 |
| ok430 SA vs. ok430;km25 SA     | 23.25 | Yes | ***  | 0.0001   | 30.8  | 7.545 | 23.25 | 6.054 | 25 | 11 | 3.841   | 422 |
| ok1474 SA vs. ok1474;ok1207 SA | 7.492 | No  | ns   | 0.2135   | 37.87 | 30.38 | 7.492 | 6.013 | 15 | 16 | 1.246   | 422 |
| ok1474 SA vs. ok1474;km25 SA   | 28.07 | Yes | **** | < 0.0001 | 37.87 | 9.8   | 28.07 | 6.83  | 15 | 10 | 4.109   | 422 |
| ok1207 SA vs. ok1474;ok1207 SA | 23.71 | Yes | ***  | 0.0002   | 54.08 | 30.38 | 23.71 | 6.389 | 12 | 16 | 3.711   | 422 |
| ok1207 SA vs. ok1207;km25 SA   | 15.31 | No  | *    | 0.0227   | 54.08 | 38.77 | 15.31 | 6.698 | 12 | 13 | 2.286   | 422 |
| tm3642 SA vs. tm3642;km25 SA   | 19.39 | Yes | ***  | 0.0008   | 54.89 | 35.5  | 19.39 | 5.749 | 18 | 16 | 3.373   | 422 |
| km25 SA vs. ok430;km25 SA      | 34.86 | Yes | **** | < 0.0001 | 42.41 | 7.545 | 34.86 | 6.178 | 22 | 11 | 5.643   | 422 |
| km25 SA vs. ok1474;km25 SA     | 32.61 | Yes | **** | < 0.0001 | 42.41 | 9.8   | 32.61 | 6.381 | 22 | 10 | 5.11    | 422 |
| km25 SA vs. ok1207;km25 SA     | 3.64  | No  | ns   | 0.5344   | 42.41 | 38.77 | 3.64  | 5.853 | 22 | 13 | 0.6219  | 422 |
| km25 SA vs. tm3642;km25 SA     | 6.909 | No  | ns   | 0.2095   | 42.41 | 35.5  | 6.909 | 5.497 | 22 | 16 | 1.257   | 422 |
| N2 PA vs. ok430 PA             | 1.1   | No  | ns   | 0.8832   | 66.3  | 65.2  | 1.1   | 7.482 | 10 | 10 | 0.147   | 422 |
| N2 PA vs. ok1474 PA            | 3.2   | No  | ns   | 0.6691   | 66.3  | 63.1  | 3.2   | 7.482 | 10 | 10 | 0.4277  | 422 |
| N2 PA vs. ok1207 PA            | 12.7  | No  | ns   | 0.0904   | 66.3  | 53.6  | 12.7  | 7.482 | 10 | 10 | 1.697   | 422 |
| N2 PA vs. tm3642 PA            | 17    | No  | *    | 0.0236   | 66.3  | 49.3  | 17    | 7.482 | 10 | 10 | 2.272   | 422 |
| N2 PA vs. km25 PA              | 29.9  | Yes | **** | < 0.0001 | 66.3  | 36.4  | 29.9  | 7.482 | 10 | 10 | 3.996   | 422 |
| N2 PA vs. ok1474;ok1207 PA     | 7.7   | No  | ns   | 0.304    | 66.3  | 58.6  | 7.7   | 7.482 | 10 | 10 | 1.029   | 422 |
| N2 PA vs. ok430;km25 PA        | 46.7  | Yes | **** | < 0.0001 | 66.3  | 19.6  | 46.7  | 7.482 | 10 | 10 | 6.241   | 422 |
| N2 PA vs. ok1474;km25 PA       | 26.9  | Yes | ***  | 0.0004   | 66.3  | 39.4  | 26.9  | 7.482 | 10 | 10 | 3.595   | 422 |
| N2 PA vs. ok1207;km25 PA       | 30    | Yes | **** | < 0.0001 | 66.3  | 36.3  | 30    | 7.482 | 10 | 10 | 4.009   | 422 |
| N2 PA vs. tm3642;km25 PA       | 40.4  | Yes | **** | < 0.0001 | 66.3  | 25.9  | 40.4  | 7.482 | 10 | 10 | 5.399   | 422 |
| ok430 PA vs. ok430;km25 PA     | 45.6  | Yes | **** | < 0.0001 | 65.2  | 19.6  | 45.6  | 7.482 | 10 | 10 | 6.094   | 422 |
| ok1474 PA vs. ok1474;ok1207 PA | 4.5   | No  | ns   | 0.5479   | 63.1  | 58.6  | 4.5   | 7.482 | 10 | 10 | 0.6014  | 422 |
| ok1474 PA vs. ok1474;km25 PA   | 23.7  | Yes | **   | 0.0016   | 63.1  | 39.4  | 23.7  | 7.482 | 10 | 10 | 3.167   | 422 |
| ok1207 PA vs. ok1474;ok1207 PA | -5    | No  | ns   | 0.5044   | 53.6  | 58.6  | -5    | 7.482 | 10 | 10 | 0.6682  | 422 |
| ok1207 PA vs. ok1207;km25 PA   | 17.3  | No  | *    | 0.0213   | 53.6  | 36.3  | 17.3  | 7.482 | 10 | 10 | 2.312   | 422 |
| tm3642 PA vs. tm3642;km25 PA   | 23.4  | Yes | **   | 0.0019   | 49.3  | 25.9  | 23.4  | 7.482 | 10 | 10 | 3.127   | 422 |
| km25 PA vs. ok430;km25 PA      | 16.8  | No  | *    | 0.0253   | 36.4  | 19.6  | 16.8  | 7.482 | 10 | 10 | 2.245   | 422 |
| km25 PA vs. ok1474;km25 PA     | -3    | No  | ns   | 0.6887   | 36.4  | 39.4  | -3    | 7.482 | 10 | 10 | 0.4009  | 422 |
| km25 PA vs. ok1207;km25 PA     | 0.1   | No  | ns   | 0.9893   | 36.4  | 36.3  | 0.1   | 7.482 | 10 | 10 | 0.01336 | 422 |
| km25 PA vs. tm3642;km25 PA     | 10.5  | No  | ns   | 0.1613   | 36.4  | 25.9  | 10.5  | 7.482 | 10 | 10 | 1.403   | 422 |
