# Supplementary material for: Conserved Nutrient Sensor O-GlcNAc Transferase Is Integral to C. elegans Pathogen-Specific Immunity
Source: PubMed Central journal article supplement (PMC4256294; doi:10.1371/journal.pone.0113231), 2014-12-04
Supplement: pone.0113231.s010.pdf [file pone.0113231.s010.pdf]

Table S3. Broodsize statistics

|               |            |              |            |                    |    |    |        |     |
|---------------|------------|--------------|------------|--------------------|----|----|--------|-----|
| Alpha         | 0.001      |              |            |                    |    |    |        |     |
|               | Mean Diff. | Significant? | Summary    | Individual P Value |    |    |        |     |
| N2 vs. ok1474 | 20.67      | No           | **         | 0.0069             |    |    |        |     |
| N2 vs. ok430  | 30.51      | Yes          | ***        | 0.0005             |    |    |        |     |
| N2 vs. ok1207 | 0.1143     | No           | ns         | 0.988              |    |    |        |     |
| N2 vs. tm3642 | -6.849     | No           | ns         | 0.4347             |    |    |        |     |
| N2 vs. km25   | 2.901      | No           | ns         | 0.6639             |    |    |        |     |
|               |            |              |            |                    |    |    |        |     |
| Test details  | Mean 1     | Mean 2       | Mean Diff. | SE of diff.        | n1 | n2 | t      | DF  |
|               |            |              |            |                    |    |    |        |     |
| N2 vs. ok1474 | 209        | 188.4        | 20.67      | 7.621              | 63 | 45 | 2.712  | 558 |
| N2 vs. ok430  | 209        | 178.5        | 30.51      | 8.661              | 63 | 30 | 3.523  | 558 |
| N2 vs. ok1207 | 209        | 208.9        | 0.1143     | 7.621              | 63 | 45 | 0.015  | 558 |
| N2 vs. tm3642 | 209        | 215.9        | -6.849     | 8.762              | 63 | 29 | 0.7817 | 558 |
| N2 vs. km25   | 209        | 206.1        | 2.901      | 6.673              | 63 | 75 | 0.4347 | 558 |

|              |            |              |            |                    |    |    |       |     |
|--------------|------------|--------------|------------|--------------------|----|----|-------|-----|
| Alpha        | 0.001      |              |            |                    |    |    |       |     |
|              | Mean Diff. | Significant? | Summary    | Individual P Value |    |    |       |     |
| N2 vs. ga80  | 83.37      | Yes          | ****       | < 0.0001           |    |    |       |     |
|              |            |              |            |                    |    |    |       |     |
| Test details | Mean 1     | Mean 2       | Mean Diff. | SE of diff.        | n1 | n2 | t     | DF  |
|              |            |              |            |                    |    |    |       |     |
| N2 vs. ga80  | 195        | 111.7        | 83.37      | 10.64              | 33 | 38 | 7.837 | 217 |
