# Supplementary material for: Conserved Nutrient Sensor O-GlcNAc Transferase Is Integral to C. elegans Pathogen-Specific Immunity
Source: PubMed Central journal article supplement (PMC4256294; doi:10.1371/journal.pone.0113231), 2014-12-04
Supplement: pone.0113231.s011.pdf [file pone.0113231.s011.pdf]

**Table S4.** Categories of genes identified as enriched by DAVID analysis of microarray samples of L4 animals comparing *ogt-1(ok1474)*, *oga-1(ok1207)*, or *pmk-1(km25)* with N2 on OP50. Functional annotation clustering was performed using DAVID default settings and highlights biological pathways enriched more than 2 fold in each set with  $p < 0.05$ .

| <b><i>ogt-1(ok1474)</i> enriched</b> |                  | <b><i>oga-1(ok1207)</i> enriched</b>            |                  | <b><i>pmk-1(km25)</i> enriched</b>              |                  |
|--------------------------------------|------------------|-------------------------------------------------|------------------|-------------------------------------------------|------------------|
| Category                             | Enrichment score | Category                                        | Enrichment score | Category                                        | Enrichment score |
| cysteine-rich repeat                 | 6.35             | collagen                                        | 11.43            | collagen                                        | 15.1             |
| pan-1 domain/apple-like              | 4.67             | molting cycle and multicellular organism growth | 9.45             | sterol-sensing                                  | 9.48             |
| carbohydrate binding                 | 4.03             | sterol-sensing                                  | 9.45             | molting cycle and multicellular organism growth | 7.56             |
| collagen                             | 3.92             | pan-1 domain                                    | 6.71             | signal peptide/glycoprotein                     | 7.2              |
| signal peptide and glycoprotein      | 3.58             | cuticle development                             | 4.95             | cuticle development                             | 7.19             |
| cytochrome p450                      | 2.96             | protein splicing                                | 4.44             | cysteine-rich repeat                            | 7.16             |
| proteolysis                          | 2.67             | protease                                        | 3.57             | pan-1 domain                                    | 5.03             |
| protein maturation and processing    | 2.86             | carbohydrate binding                            | 3.47             | carbohydrate binding                            | 4.84             |
| glycosidase/chitin processing        | 2.5              | cysteine-rich repeat                            | 3.06             | protein splicing                                | 4.1              |
| molting and development              | 2.33             | protein of unknown function                     | 2.57             | protease                                        | 3.38             |
| lipid binding                        | 2.26             | cytochrome p450                                 | 2.06             | c-type lectin                                   | 3.21             |
| protein of unknown function          | 2.14             |                                                 |                  | polysaccharide metabolic process                | 3.13             |
|                                      |                  |                                                 |                  | enzyme inhibitor activity                       | 2.86             |
